# Supplementary material for: Effects of Casein Phosphopeptide-Selenium Complex on the Immune Functions in Beagle Dogs
Source: MDPI journal article supplement (doi:10.3390/ani12162037), 2022-08-10
Supplement: s1 [file s1]

## Supplementary Materials

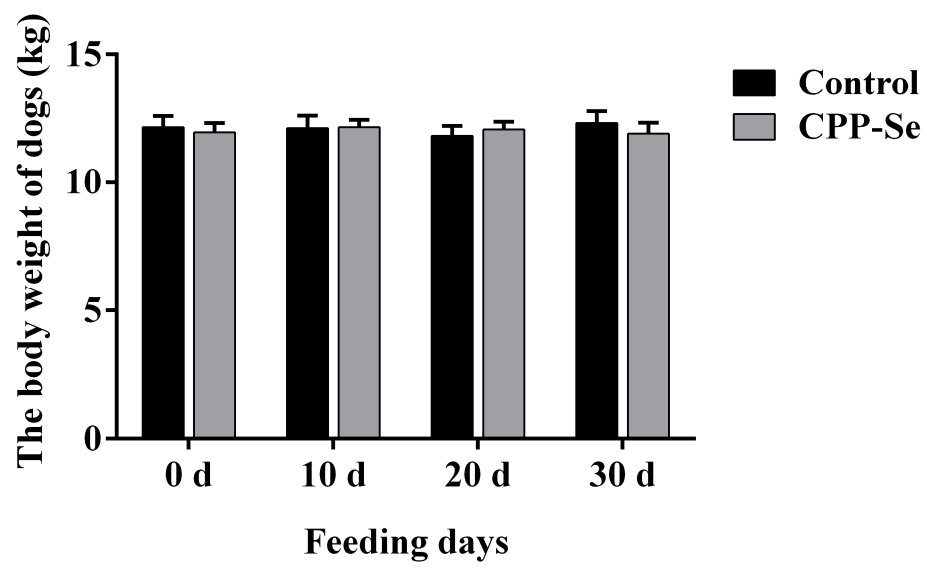

Supplementary Figure S1. The body weight of dogs during the experiment.

**Supplementary Table S1.** Serum biochemical data of dogs fed for 30 days.

| Group   | Gender | Number | Items      |             |            |                    |                  |                      |
|---------|--------|--------|------------|-------------|------------|--------------------|------------------|----------------------|
|         |        |        | GGT        | ALT         | AST        | TB                 | SUN              | SCR                  |
|         |        |        | (0-10 U/L) | (5-125 U/L) | (0-50 U/L) | (0-15 $\mu$ mol/L) | (2.5-9.6 mmol/L) | (44-159 $\mu$ mol/L) |
| Control | Male   | 1      | 9          | 19          | 29         | 1                  | 8.04             | 39.1                 |
|         |        | 2      | 7          | 20          | 33         | 1                  | 8.72             | 56.4                 |
|         |        | 3      | 5          | 41          | 50         | 1                  | 7.41             | 90.2                 |
|         |        | 4      | 6          | 28          | 49         | 1                  | 6.46             | 64.8                 |
|         |        | 5      | 2          | 46          | 44         | 1.3                | 6.33             | 66                   |
|         | Female | 1      | 2          | 30          | 49         | 1.9                | 7.48             | 55.9                 |
|         |        | 2      | 2          | 63          | 33         | 1                  | 9.5              | 62.9                 |
|         |        | 3      | 5          | 35          | 32         | 3.5                | 8.26             | 80.2                 |
|         |        | 4      | 5          | 29          | 38         | 1                  | 6.52             | 52.9                 |
|         |        | 5      | 7          | 42          | 25         | 1.4                | 6.14             | 45.4                 |
| CPP-Se  | Male   | 1      | 2          | 27          | 39         | 4.3                | 6.01             | 78.8                 |
|         |        | 2      | 5          | 23          | 43         | 1                  | 4.47             | 48.2                 |
|         |        | 3      | 2          | 43          | 44         | 2.4                | 6.45             | 60.1                 |
|         |        | 4      | 5          | 31          | 44         | 2.3                | 7.04             | 72.7                 |
|         |        | 5      | 6          | 40          | 36         | 2.2                | 7.45             | 66.4                 |
|         | Female | 1      | 9          | 98          | 44         | 3.6                | 8.66             | 64.5                 |
|         |        | 2      | 2          | 51          | 30         | 1.6                | 9.5              | 52                   |
|         |        | 3      | 2          | 55          | 34         | 4.3                | 5.6              | 70.3                 |
|         |        | 4      | 6          | 53          | 27         | 3.8                | 4.61             | 53.3                 |
|         |        | 5      | 2          | 77          | 36         | 2.7                | 6.82             | 54.5                 |

Note: GGT, ALT, AST, TB, SUN, SCR and PI represent glutamyltransferase, alanine aminotransferase, aspartate aminotransferase, total bilirubin, serum urea nitrogen, serum creatinine

and inorganic phosphorus, respectively.
